# Supplementary material for: Biomechanical properties of predator-induced body armour in the freshwater crustacean Daphnia
Source: PubMed Central journal article supplement (PMC5575280; doi:10.1038/s41598-017-09649-5), 2017-08-29
Supplement: 41598_2017_9649_MOESM1_ESM.pdf [file 41598_2017_9649_MOESM1_ESM.pdf]

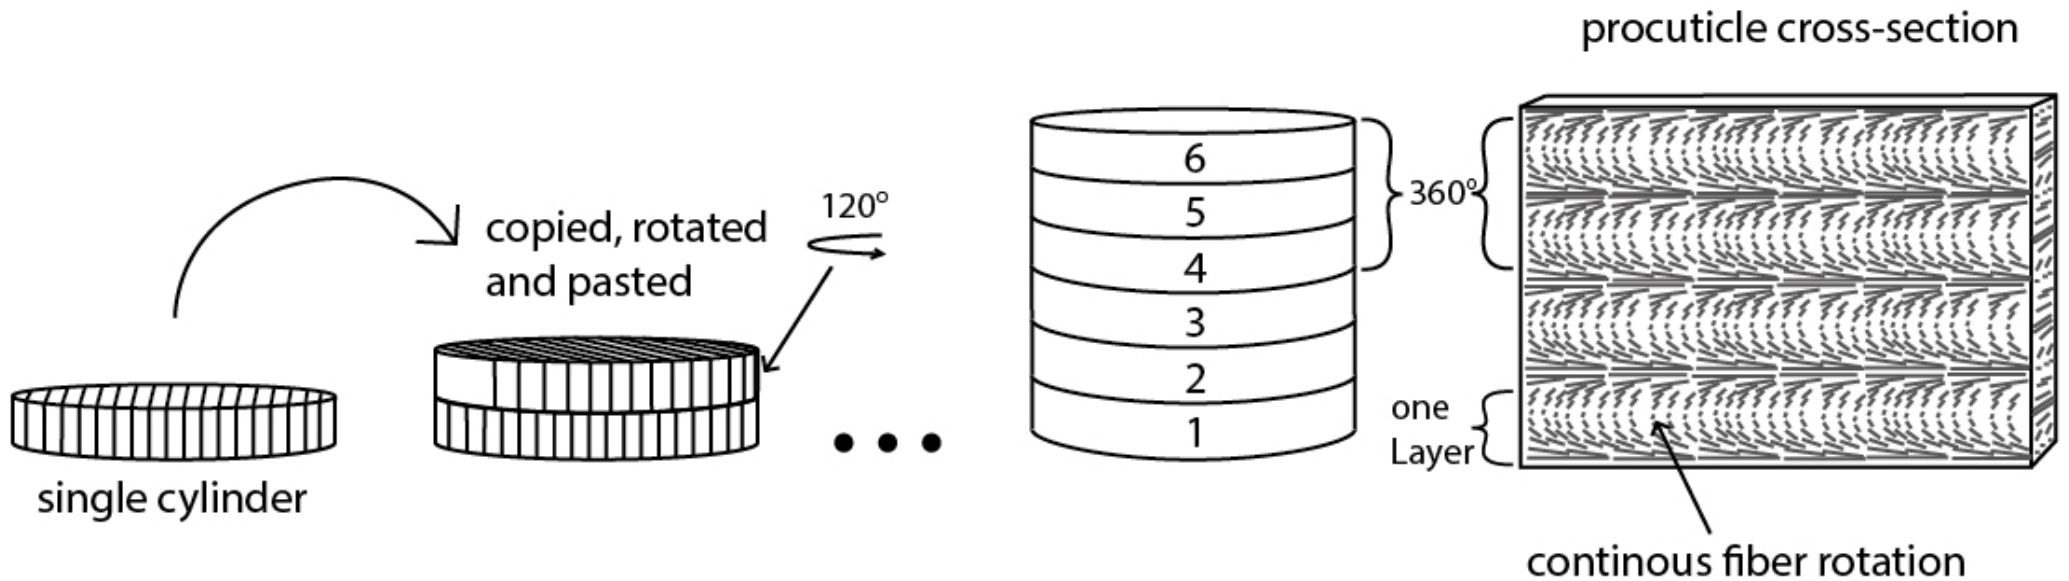

**S-Figure 1:** Scheme of the procuticle modelling for FEA. First a cylinder was created, subdivided into elements with alternating material properties reflecting the chitin-protein matrix, and afterwards simulated for mechanical impact. Then the initially build cylinder was copied, superimposed, rotated ( $120^\circ$ ) and pasted on top of the former cylinder, followed by the next simulation. This procedure was repeated to a maximum of 6 stacked cylinders. Each of these cylinders represented  $120^\circ$  of fibre rotation. Thus, three cylinders represented  $360^\circ$  fibre-rotation, equal to two procuticle layers, observed in STEM.

S. Kruppert, M. Horstmann, L. C. Weiss, U. Witzel, C. F. Schaber, S. N. Gorb, R. Tollrian

“Biomechanical properties of predator-induced body armour in the freshwater crustacean *Daphnia*”
